# Supplementary material for: Current knowledge, attitude, and patterns of oral contraceptives utilization among women in Jordan
Source: PubMed Central journal article supplement (PMC4677435; doi:10.1186/s12905-015-0275-1), 2015-12-14
Supplement: 12905_2015_275_MOESM1_ESM.pdf [file 12905_2015_275_MOESM1_ESM.pdf]

## **The usage of contraceptive pills in birth control by a sample of Jordanian women (August 2013)**

1. **Age**  18-25  26-30  31-35  36-40  41-45  more than 46
2. **Education**  
 Primary  Secondary  Community college  Undergraduate  Postgraduate
3. **Occupation**  Student  Employee at public sector  Employee at private public  
 Business owner  Housewife  Retired
4. **Residence**  Amman  Irbid  Zarqaa  Salt  Ma'an  Madaba  Tafileh  Mafrag  
 Aqaba  Karak  Jarash  Other cities in Jordan
5. **Nationality**  Jordanian  Not Jordanian
6. **Monthly income of the family**  Less than 1000 JD  More than 1000 JD
7. **Number of members who benefit from the monthly income**  
 1-2  3-5  6-10  More than 10
8. **Marriage period**  Less than 1 year  1-2 years  2-5 years  More than 5 years
9. **Any previous pregnancies?**  Yes  No
10. **If the answer to the previous answer was yes, how many?**  1  2  3  4  More than 4
11. **Do you have children?**  Yes  No
12. **If the answer to the previous answer was yes, how many?**  1  2  3  4  More than 4
13. **Has there been any abortions?**  Yes  No
14. **If the answer to the previous answer was yes, how many?**  1  2  3  4  More than 4
15. **Have you ever used contraceptive pills?**  Yes  No
16. **If the answer to the previous answer was yes, for what purpose did you use them?**  
 Birth control  To stop menstrual cycle  Other
17. **Have you consulted a doctor before using the pills?**  Yes  No
18. **Were pills dispensed with prescription?**  Yes  No

**19. Do you prefer using contraceptive pills on other contraceptive methods?**  Yes  No

**20. If the answer to the previous answer was yes, what is the reason?**

Easiness of use  Availability  Effectiveness  Suits body type  Safe

**21. Do you think that contraceptive pills are effective?**  Yes  No

**22. Do you think that contraceptive pills are safe?**  Yes  No

**23. Are you afraid of the side effects of the pills?**  Yes  No

**24. Do you think that contraceptive pills are related to any of the following diseases?**

Breast cancer  Uterine cancer  Infertility  Hormonal turbulence  None

**25. Did you suffer any side effects from the pills?**  Yes  No

**26. If the answer to the previous answer was yes, what side effects did you manifest?**

Weight gain  Mood swings  Headache  Migraine  PMS  Premenstrual bloating

Irritability  Breast swelling  Change in sexual desire  Menstrual turbulence  Acne

**27. Who recommended the contraceptive pills?**

Husband  Family  Neighbors  Physician  Pharmacist  Nurse  Midwife  Media

**28. Have you ever stopped using the pills and tried any other contraceptive methods?**  Yes  No

**29. If the answer to the previous answer was yes, what was the reason for trying other methods?**

Suffered side effects  Pills were not effective  Hard to commit to the pills  Pills are expensive

Pills unavailability  Other

**30. Do you know how the contraceptive pills work?**  Yes  No

**31. If the answer to the previous answer was yes, how do you know?**

Physician  Pharmacist  Media  Books  Internet  Other

**32. Were the contraceptive pills effective in birth control?**  Yes  No

**33. Did any pregnancies occur during pills usage?**  Yes  No

**34. Do you know what medication can counteract the effect of contraceptive pills?**  Yes  No

**35. Do you think that antibiotics could counteract the effect of contraceptive pills?**  Yes  No

**36. Did the physician/pharmacist give you information on how to preserve the pills effect?**

Yes  No

**37. Did the physician/pharmacist give you information on how to use the pills?**  Yes  No
